# Supplementary material
Source: PubMed Central journal article supplement (PMC2950182)

**Appendix 1:** Radiographs showing (A) transverse fracture of the distal radius without significant angulation and (B) minimally angulated greenstick fracture of the distal radius.

**A**

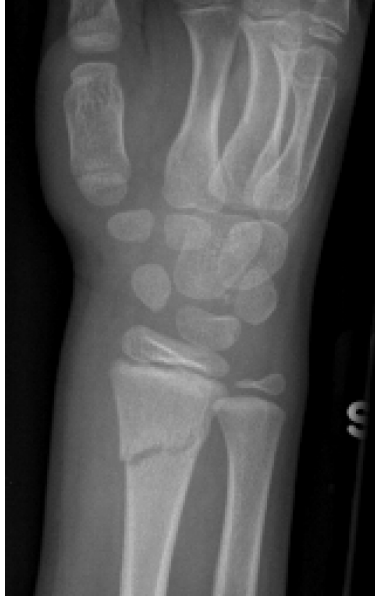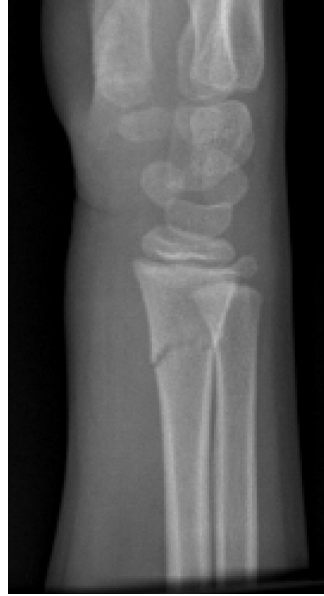

**B**

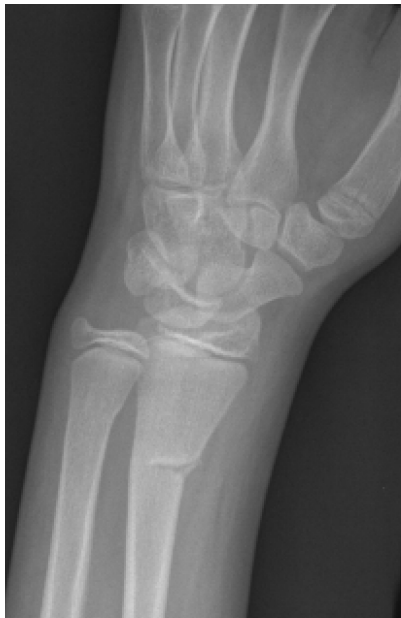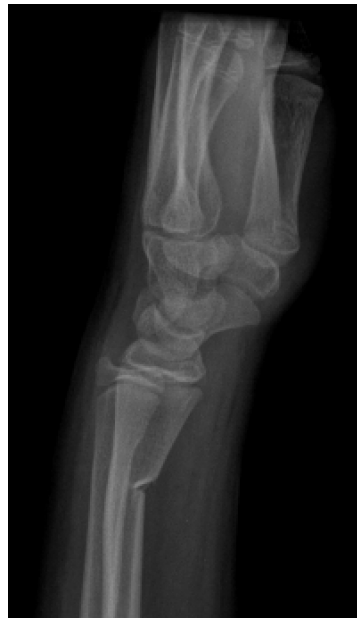

Supplement: 100119_1.pdf [file 100119_1.pdf]
